# Supplementary material for: Redox couple related influences of π-conjugation extension in organic dye-sensitized mesoscopic solar cells
Source: Royal Society of Chemistry journal article supplement (doi:10.1039/c1sc00199j), 2011-01-01
Supplement: c1sc00199j.pdf [file c1sc00199j.pdf]

## **Electronic Supplementary Information**

### **Redox couple related influences of $\pi$ -conjugation extension in organic dye-sensitized mesoscopic solar cells**

Min Zhang, Jingyuan Liu, Yinghui Wang, Difei Zhou and Peng Wang\*

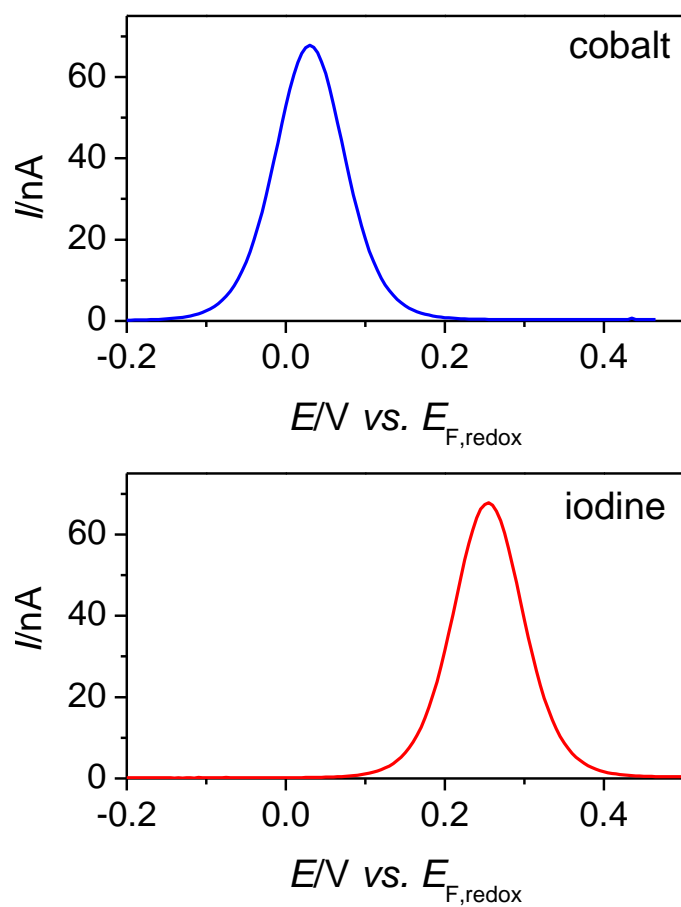

**Fig. S1** Square-wave voltammograms of ferrocene dissolved in acetonitrile measured with the homemade cobalt and iodine reference electrodes.

**Table S1** Dipole moments and polarizabilities of T1 and T3 calculated at the B3LYP level

| dye       | dipole/D | polarizability/Å <sup>3</sup> |
|-----------|----------|-------------------------------|
| <b>T1</b> | 10.8     | 87.5                          |
| <b>T3</b> | 12.4     | 130.3                         |

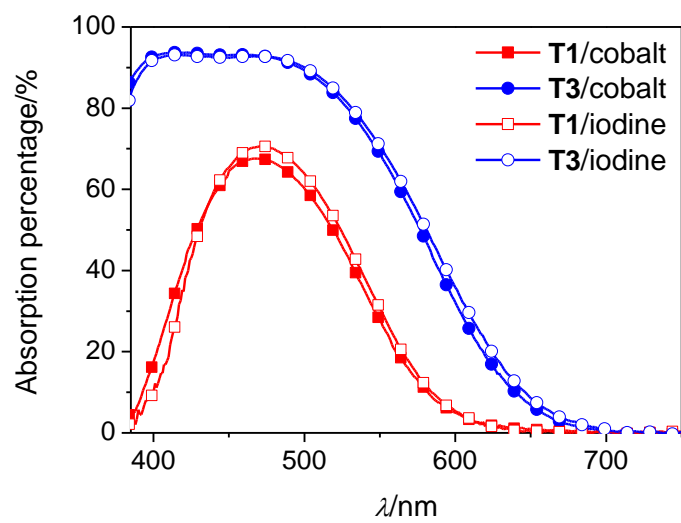

**Fig. S2** Absorption percentages of 2.8- $\mu\text{m}$ -thick, dye-coated titania films in contact with the cobalt and iodine electrolytes.

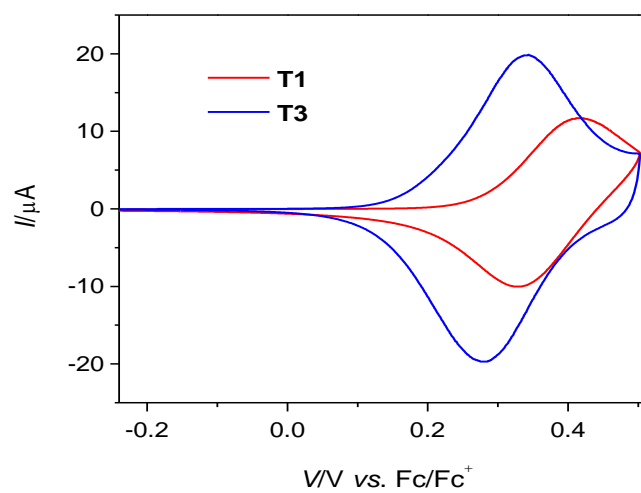

**Fig. S3** Cyclic voltammograms of dye-coated titania films immersed in 1-ethyl-3-methylimidazolium bis(trifluoromethanesulfonyl)imide.

**Table S2** Half-reaction time derived from transient absorption measurements

| dye       | inert electrolyte | cobalt electrolyte | iodine electrolyte |
|-----------|-------------------|--------------------|--------------------|
| <b>T1</b> | 3 ms              | 8 $\mu$ s          | 2 $\mu$ s          |
| <b>T3</b> | 6 ms              | 21 $\mu$ s         | 36 $\mu$ s         |
